# Supplementary material
Source: Springer Nature journal article supplement (https://www.springermedizin.de/resource/supplementary/13032_2008_15_MOESM2_ESM.pdf/9651442)
Supplement: MOESM2 [file 9651442]

Blunt Thoracic Trauma Patients Admitted to  
HCMC, 38 screened

inclusion criteria

1. Subject admitted within last 48 hours
2. Subject has blunt or penetrating chest wall injury, with one or more of:
  - a. 2 or more rib fractures
  - b. Pulmonary contusion
  - c. Sternal fracture
  - d. Clavicular or scapular fracture
  - e. SCI pts (T5 and above) deemed stable
  - f. Trauma/thoracic surgery pts.  $\geq$  24 hrs post-op.
  - g. Hemothorax
  - h. Pneumothorax w/ 1 or more chest tubes
3. Subject 18 years or older
4. Subject or Subject Family informed on study and signed subject consent

Meet criteria

Exclusion criteria

1. Subject have Glasco Coma Scale (GCS) score  $\leq$  13 @ 24 – 48 hrs. and no intracranial pressure monitoring?
2. Pregnant?
3. Less than 18 years old?
4. Unstable spinal injury?
5. Active hemoptysis and hemodynamic instability?
6. ICP  $>$  20 mm Hg?
7. CPP of  $<$  70?
8. Unstable pelvic fracture requiring Mast trousers or towel wrap which prevents rolling of patient?

28 patients meet criteria, 25  
patients consent

Pts. meet inclusion, not exclusion criteria and sign  
informed consent  
(n = 25)

4 patients drop-out. Final n = 21 patients
